# Supplementary material for: Mesoporous, anisotropic nanostructures from bioinspired polymeric catecholamine neurotransmitters and their potential application as photoacoustic imaging agents
Source: Royal Society of Chemistry journal article supplement (doi:10.1039/d2tb01756c), 2022-01-01
Supplement: d2tb01756c2.xlsx [file d2tb01756c2.xlsx]

## Sheet: Sheet1
Change values in GREEN squares only!
Bowl shaped particles				Area calculation
r_a	80	nm		Outer surface	63412.5	nm^2
r_b	100	nm		Inner surface	22944	nm^2
r_p	5	nm		Lid correction	1099.56	nm^2
r_h	35	nm		Pore correction	298451	nm^2
tau	40	nm		Total SA	385907	nm^2
N	100			Total SA	0.385907	um^2
e	0.6			Total SA	3.85907e-13	m^2
f	0.745356
				Volume calculation
Polymer density	1.26	g/cm^3
Polymer density	1260	kg/m^3		Shell volume	2.74785e+06	nm^3
				Lid correction	-153938	nm^3		Spherical counterpart (r_b = r)			Porous sphere (r_b = r; same pore dimensions)
				Pore correction	-314159	nm^3					-785398	nm^3
				Total volume	2.27975e+06	nm^3		4.18879e+06	nm^3		3.40339e+06	nm^3
				Total volume	0.00227975	um^3		0.00418879	um^3		0.00340339	um^3
				Total volume	2.27975e-21	m^3		4.18879e-21	m^3		3.40339e-21	m^3
				Number density calculation	Bowls			Spheres			Golf balls
				Mass of a particle	2.87248e-18	kg		5.27788e-18	kg		4.28827e-18	kg
				Mass of a particle	2.87248e-15	g		5.27788e-15	g		4.28827e-15	g
				Number of particles/gram	3.48131e+14			1.8947e+14			2.33194e+14
